# Supplementary material for: Elo Method and Race Traits: A New Integrated System for Sport Horse Genetic Evaluation
Source: Animals (Basel). 2020 Jul 6;10(7):1145. doi: 10.3390/ani10071145 (PMC7401530; doi:10.3390/ani10071145)
Supplement: Supplementary file 1 [file animals-10-01145-s001.xlsx]

## Sheet: Foglio1
Supplementary Table S1: descriptive statistics of the effects on final ELO rating
EFFECTS	mean	sd	se	n
SEX
females	1994.21	97.09	3.09	981
geldings	1992.65	97.19	13.88	49
males	2006.42	106.33	3.46	944
YEAR OF BIRTH
1995	1985.87	94.21	8.26	130
1996	2006.13	120.75	10.63	129
1997	1990.12	87.54	7.15	150
1998	1993.67	107.28	9.13	138
1999	2002.57	110.09	9.3	140
2000	1999.22	119.6	9.93	145
2001	1998.06	97.37	6.53	222
2002	2002.85	100.74	6.67	228
2003	2001.82	86.62	5.93	213
2004	2003.97	92.83	6.66	194
2005	2004.85	102.92	8.11	161
2006	2008.01	111.69	10.03	124
OVERALL	2000	101.75	2.29	1974
